# Supplementary material
Source: HighWire-hosted journal article supplement (https://ez-admanager.com/highwire/filestream/135070/field_highwire_adjunct_files/0/balint_1521.pdf)
Supplement: balint_1521.pdf [file balint_1521.pdf]

# Encefalomiелitis progresiva con rigidez y mioclonos

Una nueva variante con anticuerpos DPPX

Bettina Balint, MD  
Sven Jarius, MD  
Simon Nagel, MD  
Uwe Haberkorn, MD  
Christian Probst, PhD  
Inga Madeleine Blöcker,  
PhD  
Ramona Bahtz, PhD  
Lars Komorowski, PhD  
Winfried Stöcker, MD  
Andreas Kastrup, MD  
Martin Kuthe, MD  
Hans-Michael Meinck,  
MD

Dirección para correspondencia a la  
Dra. Balint:  
Bettina.Balint@med.uniheidelberg.de

## RESUMEN

**Objetivo:** Describir una variante novedosa y distintiva de la encefalomiелitis progresiva con rigidez y mioclonos (EPRM) asociada con anticuerpos dirigidos contra la proteína 6 tipo dipeptidil peptidasa (DPPX), una subunidad reguladora de los canales de potasio Kv4.2 de la superficie neuronal.

**Métodos:** Una serie de casos que describe las características clínicas, paraclínicas y serológicas de 3 pacientes con EPRM. Se utilizó un ensayo de inmunofluorescencia indirecta de base celular con células HEK293 que expresan DPPX para detectar anticuerpos DPPX, en conjunción con tejidos de mamíferos.

**Resultados:** Todos los pacientes se presentaron con un síndrome distintivo que involucró hipereplexia, ataxia cerebelosa prominente con alteración marcada de los movimientos oculares y rigidez de tronco de intensidad variable. Los síntomas adicionales fueron alodinia, prurito neurogénico y síntomas gastrointestinales. Los síntomas comenzaron de manera insidiosa y progresaron lentamente. En todos los pacientes se encontró un perfil inflamatorio en el LCR, con leve pleocitosis y síntesis intratecal de inmunoglobulina G. Se detectaron niveles elevados del anticuerpo DPPX en el suero y el LCR de los pacientes. La respuesta a la inmunoterapia fue buena, pero puede necesitarse un tratamiento constante y agresivo.

**Conclusión:** Estos casos resaltan el espectro en expansión tanto de la EPRM como de los anticuerpos neuronales. La prueba de anticuerpos DPPX debería ser considerada en el algoritmo diagnóstico de los pacientes con hipereplexia, ataxia cerebelosa y rigidez adquiridas, porque tales pacientes podrían beneficiarse de la inmunoterapia. Se necesitan más estudios para dilucidar tanto el espectro clínico completo de los anticuerpos DPPX como su rol en la patogénesis. **Neurology® 2014;82:1521–1528.**

## GLOSARIO

**DPPX** = proteína 6 tipo dipeptidil peptidasa; **EOG** = electrooculografía; **EPRM** = encefalomiелitis progresiva con rigidez y mioclonos; **FDG** = [<sup>18</sup>F]-fluorodesoxiglucosa; **GAD** = ácido glutámico decarboxilasa; **Ig** = inmunoglobulina; **IgEV** = inmunoglobulina EV; **SHR** = síndrome del hombre rígido.

La rigidez combinada con espasmos violentos y sobresaltos exagerados (hipereplexia) son las características principales del síndrome del hombre rígido (SHR), que abarca desde la variante mínima de síndrome de pierna rígida a la variante compleja de encefalomiелitis progresiva con rigidez y mioclonos (EPRM).<sup>1,2</sup> Los anticuerpos asociados están principalmente dirigidos al ácido glutámico decarboxilasa (GAD),<sup>3</sup> a los receptores de glicina<sup>4,5</sup> o anfifisina.<sup>6</sup> La ataxia cerebelosa y el nistagmo se observan con frecuencia, en particular en pacientes con anticuerpos anti-GAD.<sup>1,7</sup>

Acá reportamos 3 pacientes con una variante distintiva de EPRM, compuesta por marcada hipereplexia, ataxia cerebelosa y rigidez de tronco, que fueron negativos para los anticuerpos descritos hasta ahora, pero positivos para un nuevo anticuerpo dirigido contra la proteína 6 tipo dipeptidil peptidasa (DPPX o DPP6). Esta proteína es un componente extracelular de los canales neuronales de potasio Kv4.2.<sup>8,9</sup> Los anticuerpos contra la DPPX fueron descritos muy recientemente en 4 pacientes con encefalitis y síntomas de hiperexcitabilidad del SNC, que incluyen hipereplexia, temblor y mioclonos.<sup>10</sup>

**MÉTODOS Pacientes.** Los pacientes fueron diagnosticados y tratados en el *University Department of Neurology*, Heidelberg, Alemania. Sus características clínicas se describen más adelante en este artículo.

De los Departments of Neurology (B.B., S.J., S.N., H.-M.M.) y Nuclear Medicine (U.H.), University of Heidelberg; Institute for Experimental Immunology (C.P., I.M.B., R.B., L.K., W.S.), Euroimmun, Lübeck; Department of Neurology (A.K.), Klinikum Bremen Ost; Department of Neurology (M.K.), Community Hospital Herdecke, Germany.

Ir a [Neurology.org](http://Neurology.org) para declaraciones de intereses completas. La información sobre fondos y aquellas declaraciones relevantes para los autores, si existiesen, se encuentran al final del artículo.

**Estudios serológicos.** Los anticuerpos DPPX fueron detectados mediante un ensayo de inmunofluorescencia indirecta de base celular como fue previamente descrito.<sup>10</sup> Otros mosaicos de biochip (Euroimmun, Lübeck, Alemania) contenían cortes de tejido congelado (rata: hipocampo, cerebelo; mono: cerebelo, nervios, intestino y páncreas) y sustratos celulares recombinantes, cada uno expresando un antígeno neuronal diferente (NMDAR-NR1a/NR2b, AMPAR-GluR1/GluR2, GABAR-B1/B2, LGI1, CASPR2, GLRA1b, GRM1, GRM5, MOG, Tr/DNER, AQP4, GAD65, GAD67, ZIC, ARHGAP26, Yo, anfifisina, Hu, Ri, Ma1, Ma2, CV2, Sox-1 y recoverina). Se puede encontrar una descripción metodológica detallada de la detección de anticuerpos y los niveles mediante mosaicos de biochip.<sup>11</sup>

Las muestras también fueron testeadas utilizando un ensayo de radioinmunoprecipitación para anticuerpos contra el complejo VGKC (RSR Ltd., Cardiff, RU), ensayos de transferencia de línea Euroimmun (EUROLINE Neuronal Antigens Profile 2 y Profile PLUS RST: anfifisina, CV2, Ma2, Ri, Yo, Hu, recoverina, Sox-1, titina), ELISA anti-transglutaminasa tisular Euroimmun, ELISA Anti-Gliadina GAF-3X, Colitis Ulcerosa Mosaic 1 y Crohn Mosaic 1, de acuerdo con las instrucciones de los fabricantes.

El cálculo del índice de anticuerpos permite la detección de la síntesis intratecal de un anticuerpo específico, siendo considerado patológico un valor > 4 si los niveles de anticuerpo son utilizados para el cálculo (revisado en detalle en la referencia 12).

**Aprobaciones estándar de protocolo, registros y consentimiento de pacientes.** El estudio fue aprobado por el comité de ética local y todos los pacientes dieron su consentimiento informado por escrito.

**RESULTADOS** Los hallazgos clínicos y paraclínicos principales de los pacientes se resumen en la tabla.

**Reporte de casos. Caso 1.** Este chico de 16 años de edad se presentó en junio de 2009 refiriendo 1 año de inestabilidad en el brazo derecho y sobresaltos exagerados ante el ruido o al tacto en el tronco. Los síntomas se desarrollaron a lo largo de 1 mes sin otros antecedentes de importancia. Recientemente había desarrollado escoliosis. El examen físico reveló un nistagmo vertical hacia abajo, seguimiento ocular alterado y supresión incompleta del reflejo óculo-vestibular con la fijación. El reflejo de retracción cefálica fue claramente positivo con pobre habituación. La prueba índice-nariz mostró un temblor de acción en ambas manos. Tenía una escoliosis marcada en forma de S en la columna torácica, rigidez de tronco al inclinarse hacia adelante (figura 1A) y el tono muscular ligeramente rígido con reflejos osteotendinosos vivos en las piernas, sin signos piramidales. El LCR mostró leve linfocitosis con presencia de células plasmáticas (28 cél/μL; normal < 5) y síntesis intratecal de inmunoglobulina (Ig) G e IgM, sin evidencia de agentes infecciosos. La electrofisiología reveló actividad continua de la unidad motora en los músculos paraespinales torácicos. La estimulación táctil y auditiva evocó una respuesta anormal de reflejos bruscos en los músculos del cuello y paraespinales con una latencia ligeramente superior a la del reflejo de parpadeo y sin habituación obvia (figura 2). La electrooculografía (EOG) confirmó un trastorno cerebeloso de la motilidad ocular con seguimiento alterado, nistagmo vertical hacia abajo espontáneo y nistagmo horizontal evocado por la mirada. La RM de cerebro y el EEG fueron normales. El PET corporal total [<sup>18</sup>F]-fluoro-

rodesoxiglucosa (FDG) no mostró una neoplasia o anomalías en el metabolismo cerebral de la glucosa. Cuando se detectaron anticuerpos anti-neuropilo no clasificados (luego identificados como anticuerpos DPPX), se realizaron 2 intentos de tratamiento con metilprednisolona EV (500 mg por 3 días con reducción por vía oral a lo largo de 6 semanas), que produjeron sólo un efecto marginal. El tratamiento sintomático con benzodiazepinas generó un alivio en los sobresaltos excesivos. Sin embargo, en 1 año, el temblor de la mano había empeorado considerablemente y había desarrollado temblor cefálico y en la voz. En el seguimiento, a los 21 meses luego del inicio de los síntomas, podía caminar normalmente, pero no podía realizar marcha en tándem y pararse en una pierna. El resto del examen físico permanecía igual. Las pruebas neuropsicológicas identificaron mínimos déficits en la memoria a largo plazo y en la fluencia verbal. Una segunda punción lumbar mostró linfocitosis persistente (11 cél/μL) y síntesis intratecal de IgG e IgM. La inmunoglobulina EV (IgEV; 2 ciclos a 2 g/kg peso corporal total por día durante 3 y 2 días, respectivamente) no mejoró su estado en ningún aspecto, pero 5 sesiones de plasmáferesis redujeron transitoriamente tanto la hipereplexia como el temblor de manos y voz. La recurrencia de los síntomas llevó al inicio de una terapia que apuntaba a la depleción de células B con rituximab (4 ciclos cada 3 meses, cada uno de 375 mg/m<sup>2</sup>), comenzando 42 meses luego del inicio de los síntomas. Esto llevó a una mejoría gradual, basado en la *Scale for the Assessment and Rating of Ataxia* (Escala de Evaluación y Clasificación de Ataxia),<sup>13</sup> a su escritura y a registros de EOG (figura 3).

**Caso 2.** Un carpintero previamente sano notó a los 27 años que, mientras trabajaba en un andamio, una leve brisa sobre su frente lo hizo ponerse súbitamente rígido. Luego, la región estímulo sensitiva se expandió a toda su cabeza, cuello y tronco, y la rigidez muscular transitoria se volvió más y más intensa, duradera y brusca. Eventualmente, los espasmos bruscos fueron tan violentos que no fue capaz de trabajar en su oficio. Aproximadamente 1 año después del inicio de los síntomas, desarrolló un fenómeno de Raynaud, hasta tal punto que tuvo que empezar a usar guantes en el comienzo del otoño y bolsas con gel en sus bolsillos para calentarse las manos. Luego de otros 4 años, desarrolló constipación y sólo podía defecar una vez por semana. Seis años después del inicio, experimentó vértigo de algunos meses de duración y desde entonces ha tenido visión borrosa a la mirada externa y acrofobia. Recientemente, ha desarrollado parestesias y alodinia en su pecho y prurito en el cuello, donde la piel se ha engrosado y vuelto morada debido al rascado frecuente. También sintió que los músculos del tronco permanecían rígidos entre los ataques de espasmos. El examen físico 8 años después del inicio mostró espasmos reflejos bruscos de la cabeza y el tronco ante el estímulo táctil, particularmente en la frente y la espalda; de hecho, la misma respiración del examinador era suficiente para evocar

| Tabla                                   | Características clínicas, serológicas y de LCR de los pacientes |                                      |                                                           |
|-----------------------------------------|-----------------------------------------------------------------|--------------------------------------|-----------------------------------------------------------|
|                                         | Paciente 1                                                      | Paciente 2                           | Paciente 3                                                |
| <b>Demografía</b>                       |                                                                 |                                      |                                                           |
| Sexo                                    | M                                                               | M                                    | M                                                         |
| Edad al inicio, años                    | 15                                                              | 27                                   | 26                                                        |
| Duración total de la enfermedad, años   | 5                                                               | 8                                    | 18                                                        |
| <b>Signos y síntomas</b>                |                                                                 |                                      |                                                           |
| Hipereplexia                            | +++                                                             | +++                                  | +++                                                       |
| Ataxia cerebelosa                       | ++                                                              | +                                    | ++                                                        |
| Nistagmo                                | ++                                                              | +                                    | ++                                                        |
| Rigidez                                 | ++                                                              | +                                    | ++                                                        |
| Hiperreflexia                           | +                                                               | -                                    | +                                                         |
| Alodinia                                | -                                                               | +                                    | ++                                                        |
| Prurito neurogénico                     | -                                                               | +                                    | +                                                         |
| Deterioro cognitivo                     | +                                                               | -                                    | ++                                                        |
| Disautonomía                            | -                                                               | ++                                   | +++                                                       |
| Síntomas gastrointestinales             | -                                                               | +                                    | +++                                                       |
| <b>LCR</b>                              |                                                                 |                                      |                                                           |
| Linfocitosis                            | +                                                               | +                                    | +                                                         |
| Síntesis intratecal de IgG <sup>a</sup> | +                                                               | +                                    | +                                                         |
| <b>Anticuerpo DPPX</b>                  |                                                                 |                                      |                                                           |
| Valores (muestras correspondientes)     | Antes de tx: S 1:10.000;<br>LCR 1:320                           | Antes de tx: S 1:3.200;<br>LCR 1:320 | S 1:320; LCR 1:100; rango <sup>b</sup><br>S 1:320-1:1.000 |
|                                         | Luego de tx: S 1:320;<br>LCR 1:100                              | Luego de tx: S 1:320                 |                                                           |
| Índice <sup>c</sup>                     | 15                                                              | 10                                   | 9                                                         |
| <b>Terapia/respuesta</b>                |                                                                 |                                      |                                                           |
| Corticoesteroides                       | Pobre                                                           | Buena                                | Buena/corta                                               |
| IgEV                                    | Pobre                                                           | Pobre                                | Buena/corta                                               |
| PLEX                                    | Pobre                                                           | NR                                   | Ninguna                                                   |
| Rituximab                               | Buena                                                           | NR                                   | NR                                                        |
| Ciclofosfamida                          | NR                                                              | NR                                   | Ninguna                                                   |

Abreviaturas: DPPX = proteína 6 tipo dipeptidil peptidasa; IgEV = inmunoglobulina EV; IgG = inmunoglobulina G; NR = no realizado; PLEX = plasmaféresis; S = suero; tx = (inmuno)terapia.

Símbolos: - = no; + = leve; ++ = moderado; +++ = prominente.

<sup>a</sup> Incluyendo banas oligoclonales.

<sup>b</sup> Sin correlación con la inmunoterapia disponible.

<sup>c</sup> Valores: indican síntesis intratecal.

los espasmos. Los movimientos oculares eran anormales, con seguimiento alterado y nistagmo ante la mirada externa. También presentaba disdiadococinesia y movimientos en espejo de las manos, un temblor mínimo en la prueba índice-nariz y leve ataxia en la prueba talón-rodilla. Tenía marcha con leve aumento de la base de sustentación con marcha en tándem insegura, y la estabilidad postural y el salto en un pie estaban alterados. El resto del examen físico fue normal. La RM de cerebro y columna y el EEG fueron normales. El EOG confirmó los hallazgos clínicos de seguimiento alterado y mostró un nistagmo inconstante y disociado en la mirada externa. La primera punción lumbar mostró linfocitosis leve (10 células/μL) y bandas oligoclonales no pareadas, y se encontraron anticuerpos anti-neu-

ropilo de especificidad desconocida en el suero. Se inició tratamiento vía oral con metilprednisolona a bajas dosis, y la terapia adicional con clonazepam mejoró más los otros síntomas. El paciente fue luego capaz de retomar su trabajo porque los reflejos espasmódicos bruscos eran menores; la función intestinal también se normalizó. El análisis repetido del LCR identificó células plasmáticas con recuento celular normal y bandas oligoclonales no pareadas. El FDG-PET corporal total no reveló un tumor. El curso clínico se mantuvo estable por 2 años con el tratamiento mencionado. Recientemente, sin embargo, el paciente notó una rigidez constante en los músculos de la espalda, un aumento de los reflejos espasmódicos bruscos y un empeoramiento de la constipación. Se administró un curso de IgEV sin

Figura 1 Rigidez marcada de tronco y escoliosis en pacientes con anticuerpo DPPX positivo

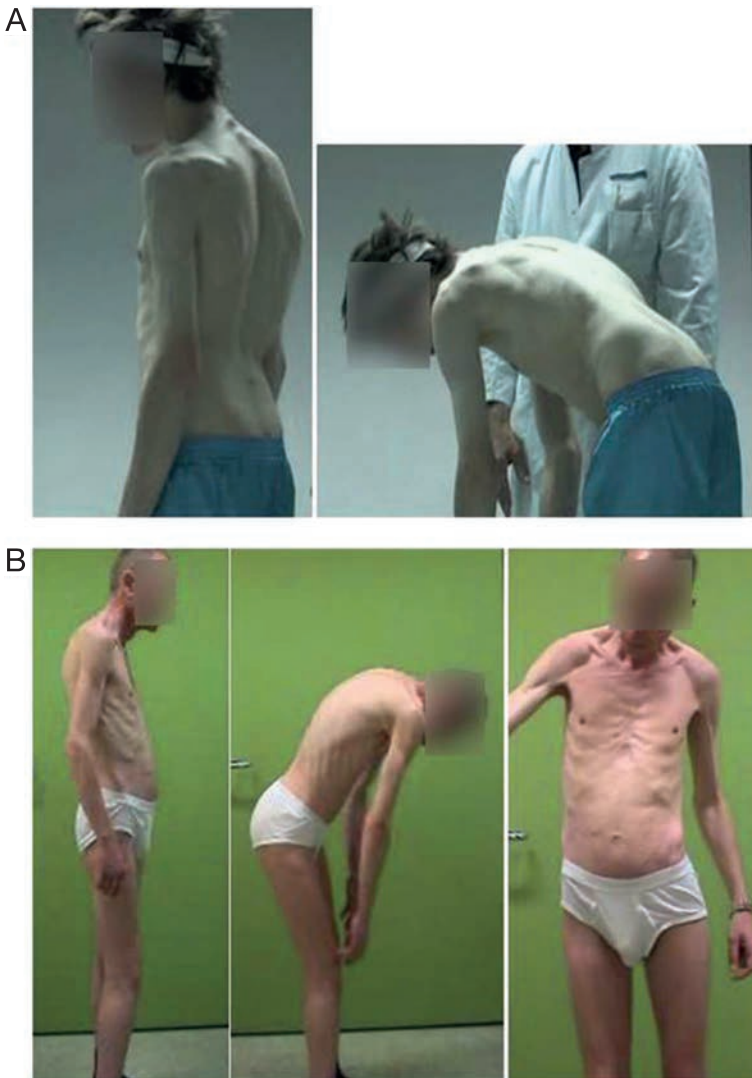

Paciente 1 (A) y paciente 3 (B) en postura erecta e inclinados hacia adelante. Nótese la pérdida de masa muscular en el paciente 3. DPPX = proteína 6 tipo dipeptidil peptidasa

efecto notable, y se está planeando una prueba con rituximab.

**Caso 3.** Este paciente fue identificado retrospectivamente debido a las características clínicas compartidas con los pacientes previos. A los 26 años, este empleado administrativo cayó enfermo con diarrea inexplicable y una pérdida de peso de 10 kg. Luego experimentó varias recaídas de alteraciones oculomotoras no clasificadas e hiperhidrosis, y evolucionó en 3 años con un curso crónico progresivo. Para entonces, había desarrollado alteración en el seguimiento, nistagmo evocado con la mirada con diplopía a la mirada lateral. Tenía rigidez severa de tronco con escoliosis (figura 1B) y marcada hipereflexia ante estímulos acústicos y táctiles de la cabeza, tronco y miembros. Los espasmos eran incluso provocados por movimientos inesperados del examinador. La supresión del reflejo oculovestibular estaba alterada. Los signos cerebelosos con-

sistían en palabra escandida y ataxia de marcha y miembros. Otros síntomas adicionales eran la alodinia, el prurito neurogénico, déficits atencionales y de memoria, hiperreflexia, retención urinaria y disfunción eréctil. Inicialmente respondió en cierta forma a altas dosis de esteroides e IgEV (2 g/kg peso por día durante 5 días). Sin embargo, los efectos no duraron mucho y el tratamiento fue discontinuado. Cuando la enfermedad progresó, se iniciaron tratamientos con ciclofosfamida y plasmaféresis (5 sesiones), nuevamente sin efecto. Durante el curso de la enfermedad, aproximadamente 18 años, perdió cerca de 40 kg y alcanzó un estado de discapacidad severa: dependía de un andador para deambular. Luego, comenzó con caídas frecuentes y, debido a episodios con pérdida de conciencia, se sospechó epilepsia. Desarrolló una tetraparesia espástica y mioclonías generalizadas; debido a la disfagia contraía neumonía de forma recurrente, por lo que requirió tratamiento en terapia intensiva, que eventualmente lo llevó a la muerte.

Los métodos diagnósticos revelaron linfocitosis en el LCR (8-11 cél/ $\mu$ L en punciones lumbares repetidas) con bandas oligoclonales no pareadas, actividad continua de unidades motoras en músculos paraespinales y reflejos musculocutáneos exagerados; los resultados del *screening* tumoral, que incluía un FDG-PET corporal total, no fueron concluyentes, y la RM de cerebro y columna fue inicialmente normal. Diecisiete años después del inicio, la RM de cerebro mostró una leve atrofia cerebelosa.

**Pruebas de anticuerpos.** La reactividad del suero con corteza cerebelosa, hipocampo y plexo mientérico fue detectada mediante inmunohistoquímica en los 3 pacientes.

La tinción en cerebelo fue más prominente en la capa de células granulosas, mostrando un patrón de fluorescencia parcheada, con anticuerpos que se unían principalmente a la periferia de las células granulosas y a los glomérulos cerebelosos. La capa molecular del cerebelo mostró una menor tinción homogénea, mientras que las células de Purkinje y la sustancia blanca no tuvieron tinción detectable.

En los subcampos hipocampales *cornu ammonis*, se detectó un patrón de tinción homogéneo del neuropilo en las áreas con dendritas basales y apicales de células piramidales (*stratum oriens*, *stratum radiatum*, *stratum lacunosum moleculare*). Por otro lado, el soma de las células piramidales se teñía sólo débilmente. De forma característica la inmunorreactividad más fuerte se observaba en el *stratum lucidum*, donde se localizan las fibras musgosas (axones de células granulosas del giro dentado). En el giro dentado, el soma de las células granulosas se teñían sólo débilmente. Sin embargo, se encontró una importante inmunotinción en el *stratum moleculare* y el hilus, que contenían las dendritas y axones de las células granulosas del dentado, respectivamente.

Utilizando un ensayo de base celular con células HEK293 que expresan DPPX, los anticuerpos DPPX fueron identificados en el suero del pacien-



**Figura 2** Respuestas exageradas de sobresalto acústico en el paciente 1, evocadas luego de la instrucción y con preaviso

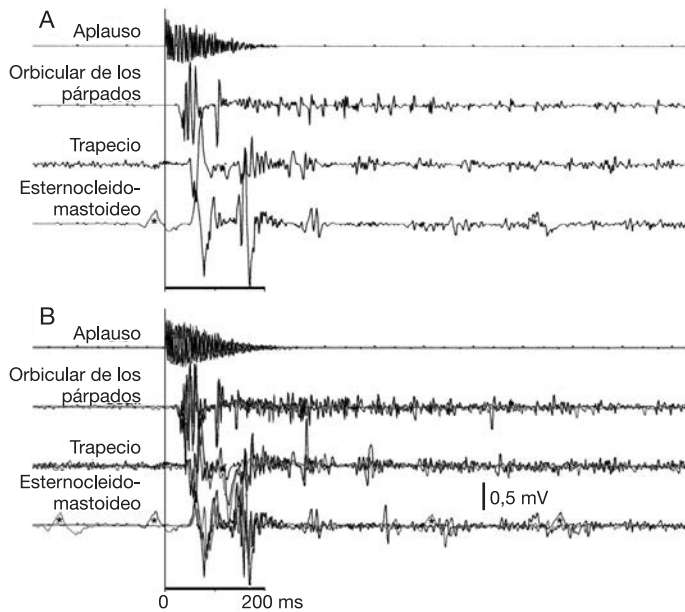

(A) Registro de un barrido del EMG de 3 músculos pericraneales con electrodos de superficie y un micrófono adherido al cuello de la camisa del paciente (aplauso). \*Artefacto de ECG. (B) Tres respuestas de sobresalto acústico consecutivas sobreimpuestas, evocadas a intervalos de aproximadamente 2 segundos. Nótese la corta latencia y la reproducibilidad exacta de las respuestas en el EMG sin obvia habituación.

te 1 (título de 1:10.000 en la primera prueba). Al agregar antígeno DPPX a la muestra de suero antes de la incubación con los sustratos celular y tisular, se anuló la reactividad específica, confirmando así a la DPPX como blanco de anticuerpos (figura 4).

En el análisis retrospectivo de las muestras de seguimiento almacenadas de este paciente, los anticuerpos DPPX también fueron detectados en LCR con un índice de anticuerpos de 15. Más aún, se encontró una correlación entre los títulos

del anticuerpo DPPX en suero/LCR y la respuesta clínica a la terapia (figura 3). Los anticuerpos DPPX fueron detectados también en el suero y el LCR del paciente 2 (títulos de 1:3.200 en suero, y de 1:320 en LCR antes de la inmunoterapia, títulos en suero de 1:320 en el seguimiento; índice de anticuerpo DPPX = 10) y del paciente 3 (títulos entre 1:320 a 1:1.000 en suero, y 1:100 en LCR; índice de anticuerpo DPPX = 9). Además, se observó reactividad del suero contra el plexo miéntérico (figura 4).

En ninguno de los 3 casos se identificaron otros anticuerpos anti-neuronales, anticuerpos asociado a enfermedad celíaca (anti-gliadina, anti-transglutaminasa celular) o formas de enfermedad inflamatoria intestinal crónica (anticuerpos anti-células globosas, anti-páncreas exocrino/CUZD1/GP2, anti-*Saccharomyces cerevisiae*, anti-citoplasma neutrófilos) al aplicar los ensayos mencionados en la sección de Métodos.

**DISCUSIÓN** Los anticuerpos DPPX han sido descritos muy recientemente en 4 pacientes con encefalitis prolongada y síntomas de hiperexcitabilidad del SNC, que incluyen temblor, mioclonías, hipereplexia prominente y signos cerebelosos, como ataxia y nistagmo.<sup>9</sup> Aquí reportamos otros 3 pacientes que se presentaron con un síndrome distintivo caracterizado por la tríada de rigidez de tronco, hipereplexia y marcada ataxia cerebelosa, en quienes se detectaron los nuevos anticuerpos contra DPPX. El fenotipo de los pacientes cumple con los criterios diagnósticos de EPRM, que comparte una variedad de características clínicas e inmunológicas con el SHR, pero también se caracteriza por signos neurológicos, como alteraciones de los movimientos oculares, ataxia o epilepsia, y en algunos casos, un curso de enfermedad más agresivo.<sup>1,2</sup>

Las presentaciones clínicas en nuestros pacientes estuvieron dominadas por la hipereplexia

**Figura 3** Características clínicas, serológicas y de LCR de los pacientes

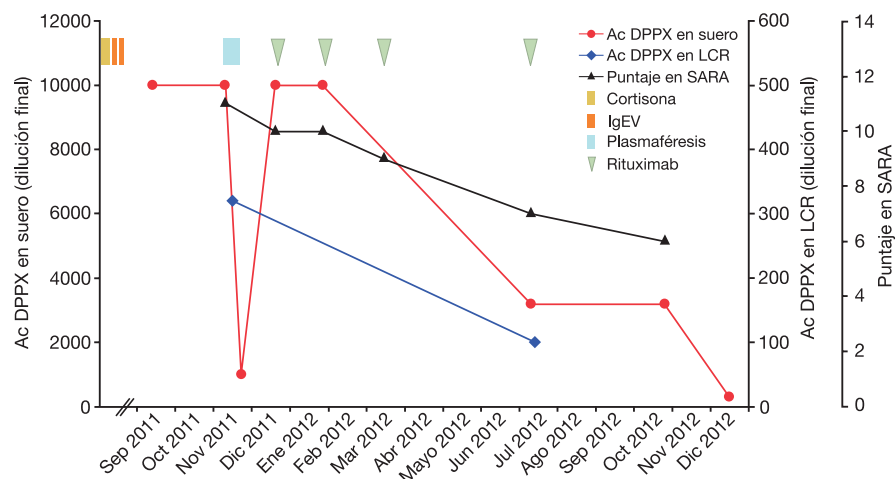

Seguimiento de los valores de anticuerpo (Ac) durante 15 meses (Paciente 1) en paralelo con las intervenciones terapéuticas indicadas. La actividad de la enfermedad está representada por puntaje en la escala de evaluación y clasificación de ataxia (SARA, Scale for the Assessment and Rating of Ataxia).<sup>13</sup> DPPX = proteína 6 tipo dipeptidil peptidasa; IgEV = inmunoglobulina EV.

Figura 4 Inhibición competitiva de la unión del anticuerpo a la DPPX

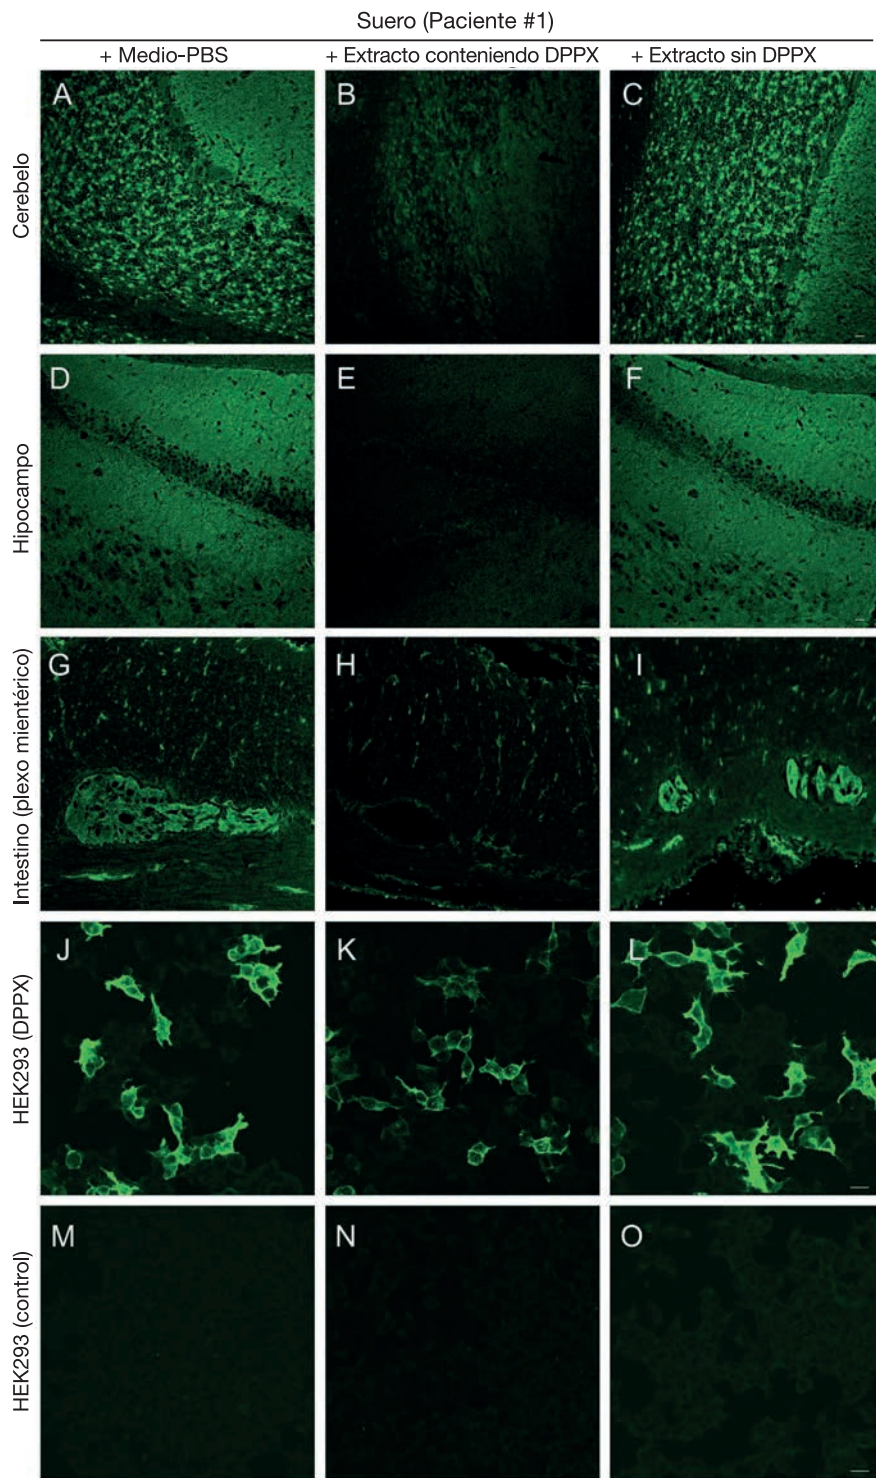

Antes de la incubación con cortes de (A-C) cerebello de rata, (D-F) hipocampo de rata, (G-I) intestino de mono, (J-L) células HEK293 expresando DPPX y (M-O) células control HEK293 transfectadas, el suero del paciente fue mezclado durante 1 hora con un medio de PBS (panel izquierdo), un extracto de células HEK expresando DPPX (panel del medio), o un extracto control sin DPPX (panel derecho). Los anticuerpos unidos fueron detectados utilizando una inmunoglobulina G anti-humano marcada con FITC (en verde). La adición del extracto conteniendo DPPX redujo fuertemente la reactividad del suero contra (B,E) el tejido encefálico, (H) el plexo mientérico intestinal y (H) el sustrato celular conteniendo DPPX, confirmando a la DPPX como un objetivo antigénico. Escala: 20  $\mu$ m. DPPX = proteína 6 tipo dipeptidil peptidasa; FITC = isotiocianato de fluoresceína; PBS = buffer fosfato salino.

y la ataxia ocular, de miembros y movimientos de tronco, mientras que la rigidez de tronco con escoliosis secundaria (pacientes 1 y 3) fue menos incapacitante. La hipereplexia estuvo asociada con reflejos de sobresalto ante los estímulos táctiles (paciente 1-3), acústicos (pacientes 1 y 3) e incluso visuales (paciente 3), con respuestas de corta latencia en los músculos del cuello. La ataxia cerebelosa incluyó un amplio rango de alteraciones cerebelosas de la motilidad ocular (nistagmo vertical hacia arriba o abajo, nistagmo evocado por la mirada, persecución lenta alterada, sacádicos dismétricos y pobre supresión del reflejo vestibulo-ocular durante la fijación). El tronco y los miembros estuvieron comprometidos con menor severidad. Otros signos incluyeron alteraciones somatosensitivas y disautonomía (pacientes 2 y 3). La enfermedad comenzó insidiosamente, en parte con recaídas y siguió un curso progresivo. La severidad global fue desde una discapacidad moderada hasta cuidados intensivos y muerte en el paciente 3, aproximadamente 18 años después del inicio de los síntomas. Es notorio que no se encontraron otros anticuerpos en nuestros pacientes, incluso aquellos conocidos por estar asociados con el espectro del SHR, la hipereplexia adquirida o la ataxia cerebelosa.

Mientras que los primeros pacientes con anticuerpos DPPX positivos tenían encefalitis severa con convulsiones, síntomas psiquiátricos, reducción de los niveles de conciencia y un curso más agudo y severo,<sup>10</sup> algunas características compartidas incluyen signos de ataxia cerebelosa y síntomas compatibles con hiperexcitabilidad del SNC, en particular hipereplexia y mioclonías. Como en la publicación original,<sup>10</sup> nuestros pacientes tuvieron linfocitosis en LCR durante el curso de la enfermedad y mostraron evidencia de síntesis intratecal de IgG. Se detectaron niveles altos de los nuevos anticuerpos DPPX, no sólo en el suero sino también en el LCR de nuestros pacientes. En particular, los índices elevados de anticuerpos específicos DPPX representan la síntesis intratecal. Junto con el perfil inflamatorio del LCR, esto indica que los anticuerpos DPPX son producidos en el compartimento del LCR, que puede explicar parcialmente la necesidad observada de una inmunoterapia escalonada y continua. De hecho, de acuerdo con la experiencia con los casos previamente descritos<sup>10</sup> y nuestra serie de casos, parece que los pacientes responden favorablemente a la inmunoterapia, pero aparenta ser necesario un tratamiento constante y agresivo.

El antígeno DPPX, una glicoproteína de membrana con un dominio extracelular grande, es una subunidad auxiliar de los canales neuronales Kv4.2.<sup>8</sup> La DPPX intensifica la probabilidad de apertura y de conductancia de canal único de los canales Kv4.2, facilita el tráfico intracelular de proteínas Kv4 y aumenta la superficie de expresión de los canales Kv4.2.<sup>14</sup> La pérdida de DPPX resulta en una hiperexcitabilidad de las dendritas con aumento de la propagación retrógrada del potencial de acción dendrítico, electrogénesis de calcio e inducción de

la potenciación sináptica a largo plazo.<sup>15</sup> Tanto las proteínas DPPX como las Kv4.2 están localizadas en el hipocampo, la corteza cerebelosa, el estriado y los núcleos pontinos.<sup>8</sup> La DPPX también se expresa en los axones de las fibras musgosas hipocampales, que carecen de proteínas Kv4.2, lo que sugiere que las proteínas DPPX pueden tener funciones adicionales no relacionadas con la Kv4.2.<sup>8</sup>

Aunque los mecanismos patogénicos exactos todavía no se conocen y aguardan mayor investigación, el hecho de que el antígeno es una proteína de superficie, hace que ya sea posible que los anticuerpos DPPX tengan un rol patogénico. Los argumentos a favor del rol patogénico de los anticuerpos DPPX en nuestros pacientes incluyen la respuesta al tratamiento con inmunoterapia con la reducción de los títulos de anticuerpos correspondiente, como se mostró en el paciente 1 y la impresión de que los síntomas y signos clínicos se correlacionan con la distribución del antígeno. El patrón de tinción tisular que produjeron los anticuerpos de nuestros pacientes fue concordante con el descrito previamente en relación con la distribución de la proteína DPPX.<sup>8</sup> La interferencia de los anticuerpos con sitios ricos en DPPX<sup>8</sup> podría explicar la ataxia cerebelosa, los déficits mnésicos y la hipereplexia observadas en nuestros pacientes. La DPPX también se expresa en las neuronas del plexo mientérico y los pacientes 3 y 4 del primer estudio tuvieron un pródromo de diarrea y marcada pérdida de peso,<sup>10</sup> como nuestro paciente 3; el paciente 2 tenía marcada constipación, que resolvió con el tratamiento esteroide. El suero de todos nuestros pacientes tuvo reactividad contra el plexo mientérico, y no se encontró otra evidencia serológica para sustentar otras causas potenciales como enfermedad inflamatoria crónica o celíaca; por lo tanto, la interferencia del anticuerpo DPPX con las funciones gastrointestinales parece plausible.

Para explorar tentativamente la asociación de los anticuerpos DPPX con el espectro del SHR, analizamos el suero de otros 8 pacientes con SHR, EPRM o hipereplexia adquirida, pero no detectamos anticuerpos DPPX en ninguno de estos casos. Ninguno de estos pacientes, sin embargo, presentó las características clínicas extendidas descritas previamente en los pacientes con anticuerpos DPPX positivos, por ej., la combinación de ataxia cerebelosa con nistagmo, hipereplexia prominente y rigidez de tronco, en el contexto de una enfermedad de curso crónico. Estos resultados preliminares pueden implicar que el anticuerpo DPPX no es un "anticuerpo unificador" en el espectro de las enfermedades del SHR, sino que sugieren una asociación cercana con el síndrome distintivo descrito previamente.

Con certeza se necesitan más estudios para determinar el rol de los anticuerpos DPPX a un nivel molecular, los mecanismos de acción patogénicos exactos y las manifestaciones clínicas asociadas. Nuestros pacientes, sin embargo, destacan un espectro clínico e inmunológico en expansión de la EPRM, e ilustran la importancia de las pruebas de

screening serológico para identificar pacientes con anticuerpos positivos que pueden beneficiarse con inmunoterapia.

### CONTRIBUCIONES DE LOS AUTORES

B. Balint estuvo involucrado en la concepción y organización del proyecto de investigación, la interpretación de los datos y la escritura del primer borrador y la crítica del manuscrito. S. Jarius estuvo involucrado en el análisis de anticuerpos y la microscopía. S. Nagel, U. Haberkorn, A. Kastrup y M. Kuthe revisaron críticamente el manuscrito. C. Probst, I.M. Blöcker, R. Bahtz, L. Komorowski y W. Stöcker estuvieron involucrados en el análisis de anticuerpos y la microscopía. H.-M. Meinck estuvo involucrado en la concepción y la organización del proyecto de investigación, la interpretación de datos y la crítica del manuscrito.

### FONDOS PARA EL ESTUDIO

No se reportan aportes de fondos.

### DECLARACIÓN DE INTERESES

B. Balint, S. Jarius, S. Nagel y U. Haberkorn no tienen nada que declarar relevante al manuscrito. C. Probst, I. Blöcker, R. Bahtz y L. Komorowski son empleados de Euroimmun. W. Stöcker es miembro del directorio de Euroimmun. A. Kastrup, M. Kuthe y H. Meinck no tienen nada que declarar relevante al manuscrito. Ir a [Neurology.org](http://Neurology.org) para declaraciones completas.

*Recibido el 4 de septiembre de 2013. Aceptado en su formato final el 24 de enero de 2014.*

### BIBLIOGRAFÍA

1. Meinck HM, Thompson PD. Stiff man syndrome and related conditions. *Mov Disord* 2002;17:853–866.
2. Khasani S, Becker K, Meinck HM. Hyperekplexia and stiff-man syndrome: abnormal brainstem reflexes suggest a physiological relationship. *J Neurol Neurosurg Psychiatry* 2004;75:1265–1269.
3. Solimena M, Folli F, Aparisi R, Pozza G, De Camilli P. Autoantibodies to GABAergic neurons and pancreatic beta cells in stiff-man syndrome. *N Engl J Med* 1990;322:1555–1560.
4. Hutchinson M, Waters P, McHugh J, et al. Progressive encephalomyelitis, rigidity, and myoclonus: a novel glycine receptor antibody. *Neurology* 2008;71:1291–1292.
5. McKeon A, Martinez-Hernandez E, Lancaster E, et al. Glycine receptor autoimmune spectrum with stiff-man syndrome phenotype. *JAMA Neurol* 2013;70:44–50.
6. De Camilli P, Thomas A, Cofield R, et al. The synaptic vesicle-associated protein amphiphysin is the 128-kD autoantigen of stiff-man syndrome with breast cancer. *J Exp Med* 1993;178:2219–2223.
7. Rakocevic G, Raju R, Semino-Mora C, Dalakas MC. Stiff person syndrome with cerebellar disease and high-titer anti-GAD antibodies. *Neurology* 2006;67:1068–1070.
8. Nadal MS, Ozaita A, Amarillo Y, et al. The CD26-related dipeptidyl aminopeptidase-like protein DPPX is a critical component of neuronal A-type K1 channels. *Neuron* 2003;37:449–461.
9. Clark BD, Kwon E, Maffie J, et al. DPP6 localization in brain supports function as a Kv4 channel associated protein. *Front Mol Neurosci* 2008;1:8.
10. Boronat A, Gelfand JM, Gresa-Arribas N, et al. Encephalitis and antibodies to dipeptidyl-peptidase-like protein-6, a subunit of Kv4.2 potassium channels. *Ann Neurol* 2013;73:120–128.
11. Stöcker W, Otte M, Ulrich S, et al. Autoimmunity to pancreatic juice in Crohn's disease: results of an autoantibody screening in patients with chronic inflammatory bowel disease. *Scand J Gastroenterol Suppl* 1987;139:41–52.
12. Reiber H, Peter JB. Cerebrospinal fluid analysis: disease-related data patterns and evaluation programs. *J Neurol Sci* 2001;184:101–122.
13. Schmitz-Hübsch T, du Montcel ST, Baliko L, et al. Scale for the assessment and rating of ataxia: development of a new clinical scale. *Neurology* 2006;66:1717–1720.
14. Kaulin YA, De Santiago-Castillo JA, Rocha CA, Nadal MS, Rudy B, Covarrubias M. The dipeptidylpeptidase-like protein DPP6 determines the unitary conductance of neuronal Kv4.2 channels. *J Neurosci* 2009;29:3242–3251.
15. Sun W, Maffie JK, Lin L, Petralia RS, Rudy B, Hoffman DA. DPP6 establishes the A-type K(1) current gradient critical for the regulation of dendritic excitability in CA1 hippocampal neurons. *Neuron* 2011;71:1102–1115.
